# Supplementary material for: Cost-effective porous-organic-polymer-based electrolyte membranes with superprotonic conductivity and low activation energy
Source: Royal Society of Chemistry journal article supplement (doi:10.1039/c9ta06807d), 2019-09-23
Supplement: c9ta06807d1.pdf [file c9ta06807d1.pdf]

## **Cost-effective porous-organic-polymer-based electrolyte membranes with superprotonic conductivity and low activation energy**

*Dong Won Kang,<sup>‡a</sup> Kyung Ah Lee,<sup>‡b</sup> Minjung Kang,<sup>a</sup> Jong Min Kim,<sup>b</sup> Minkyu Moon,<sup>a</sup> Jong Hyeak Choe,<sup>a</sup> Hyojin Kim,<sup>a</sup> Dae Won Kim,<sup>a</sup> Jin Young Kim<sup>\*b</sup> and Chang Seop Hong<sup>\*a</sup>*

<sup>a</sup>Department of Chemistry, Korea University, Seoul 02841, Korea.

E-mail: cshong@korea.ac.kr

<sup>b</sup>Center for Hydrogen Fuel Cell Research, Korea Institute of Science and Technology, 5, Hwarang-ro 14-gil, Seongbuk-gu, Seoul 02792, Republic of Korea. E-mail: jinykim@korea.ac.kr

<sup>‡</sup> These authors contributed equally to this work.

## Preparation.

All solvents and chemicals used in the synthesis were purchased from commercial suppliers and utilized without further purification. Average molecular weight of poly(vinylidene fluoride) (PVDF) powder is ~534,000 by GPC.

**Synthesis of 1 and 1S:** 1 and 1S were prepared according to the reported method.<sup>1</sup>

**Synthesis of 1SXM (X = 1, 2, and 3):** 1S (200 mg) was sonically dispersed in X M H<sub>2</sub>SO<sub>4</sub> aqueous solution (70 mL) (X = 1, 2, and 3) for 6 h. The solid was obtained by certification, and dried under N<sub>2</sub> flowing and then overnight in an oven at 100 °C.

**Synthesis of 1SXP (X = 50 and 60):** The mixed matrix membrane (MMM) of 1S/PVDF is labeled as 1SXP (X means the mass percentage of 1S in the membrane). The synthetic procedure of 1S60P was described as a representative. PVDF (200 mg) was fully dissolved in DMF (5 mL), and then 1S (300 mg) was sonically dispersed in the PVDF solution. After stirred at room temperature for 6 h, the viscous homogeneous suspension was prepared. The resultant mixture was carefully poured onto a circular glass plate with a diameter of 8 cm and dried at 40 °C for 48 h. Finally, the membrane was obtained after peeled off from the plate. The other MMM (1S50P) were fabricated from the same procedure except for the mass percentage of 1S.

**Synthesis of 1SXMP (X = 1, 2, and 3):** The MMM of 1SXM/PVDF is labeled as 1SXMP (the mass percentage of 1SXM in the membrane was set at 60%). The synthetic procedure of 1SXMP is identical to that of 1SXP except for using 1SXM instead of 1S.

**Physical Measurements.** Infrared spectra were obtained with ATR module using a Nicolet iS10 FT-IR spectrometer. Thermogravimetric analysis (TGA) was carried out in N<sub>2</sub> (99.999 %) atmosphere (flow rate = 30 mL / min) in the temperature range 30 – 600 °C (heating rate = 10 °C/min) using a Scinco TGA-N 1000. Deionized water in experiment is purified by aqua MAX™ Basic360 series. Elemental analyses for C, H, N, and S were performed at the Elemental Analysis Service Center of Sogang University. XPS were measured from Semiconductor & Display Green Manufacturing Research Center in Korea University using X-tool. Solid state <sup>13</sup>C NMR experiments were analyzed using 400 MHz Avance II+ Bruker Solid-state NMR (spinning rate: 9.5 kHz or 12 kHz, delay time(d1): 3 s, contact time: 2 ms, radio frequency: 100.4 MHz, calibration: TMS ; 0 ppm) at KBSI Seoul Western Center. EDX analysis was performed from at KBSI Seoul Center using Hitachi SU-70.

**Gas Sorption Measurements.** Before sorption analysis, the samples were degassed at 120 °C in vacuum for 10 hours. All gases used in measurements were highly pure (99.999 %) except for water vapor and O<sub>2</sub> (99.995%). H<sub>2</sub> and N<sub>2</sub> gas sorption measurement at 77 K was carried out on a Micrometrics 3 Flex instrument up to 1 atm of gas pressure. Water vapor isotherms at 298 K were performed using a Micrometrics ASAP2020 from vapor source after additionally purification using ASAP2020. O<sub>2</sub> isotherms at 195 K were collected by a BEL Belsorp mini II up to 1 atm of gas pressure. Filled and open symbols indicate adsorption and desorption, respectively.

**Impedance Analyses.** All pellets for measuring AC impedance data were prepared by homogeneously grinding the powder samples with a mortar and pestle and pressed at 2,000 ~ 4,500 kg for minutes. Whereas all membranes were intactly used. The thickness of the pellets was ranging from 0.01 to 0.05 cm and these diameter was averagely 0.5 cm. When all samples were measured, the pellet was placed in a home-made sample holder composed of Pt-based electrodes and the holder was located in a temperature and humidity controlled chamber which is ESPEC SH-222/Bench-top type. To equilibrium of temperature and humidity in the chamber, the sample was waited over 6 – 24 hours before AC measurements. And to obtain more accurate data, impedance data were collected repeatedly until the value-convergence. AC measurements were carried out using a Solartron SI 1260 Impedance/Gain-Phase Analyzer and Dielectric Interface with Pt-pressed electrodes and applied AC voltage amplitude of 100 mV and frequency range of 3 MHz – 0.1 Hz. ZView and ZPlot software were used to analyze and fit impedance plot to acquire the resistance value through designed equivalent circuit. Then, the accurate conduction values and activation energies were calculated using equations in blow.

$$\sigma = \frac{L(cm)}{A(\pi r^2) * R(\Omega)}$$

$$\ln(\sigma T) = \ln(\sigma_o T) - \frac{E_a}{K_b} \left( \frac{1}{T} \right)$$

**Single PEMFC Test.** MEAs were prepared by forming catalyst-coated gas diffusion layers. Electrodes were prepared by spraying the Pt/C (46.7 wt%) catalyst ink containing Nafion ionomer onto the porous carbon paper (GDL, 39BC-SGL). The catalyst loading amounts were 0.2 mg cm<sup>-2</sup> for anode and 0.4 mg cm<sup>-2</sup> for cathode. **1S3MP** was placed between two catalyst coated GDL using Teflon gasket. The active area was 1 cm<sup>2</sup>. The MEA was arranged between the graphite bipolar plates for single cell. The performance of prepared single cells was assessed at 50 °C and 100% RH for both anode and cathode with

gas flow rate of 200 cc min<sup>-1</sup>. H<sub>2</sub> for anode and 600 cc min<sup>-1</sup> O<sub>2</sub> for cathode. The OCV hold test was conducted with same condition.

**Table S1.** Elemental analysis data about all samples.

| Compounds    | C(%)<br>Expt. | H(%)<br>Expt. | S(%)<br>Expt. | N(%)<br>Expt. |
|--------------|---------------|---------------|---------------|---------------|
| <b>1S</b>    | 53.43         | 3.19          | 8.35          | 0             |
| <b>1S1M</b>  | 28.37         | 4.40          | 10.76         | 0             |
| <b>1S2M</b>  | 19.38         | 5.00          | 14.73         | 0             |
| <b>1S3M</b>  | 20.73         | 4.72          | 18.60         | 0             |
| <b>1S50P</b> | 44.93         | 4.08          | 7.39          | 1.96          |
| <b>1S60P</b> | 46.58         | 4.31          | 8.08          | 2.42          |
| <b>1S1MP</b> | 48.18         | 4.10          | 5.57          | 2.53          |
| <b>1S2MP</b> | 44.32         | 4.58          | 8.41          | 2.64          |
| <b>1S3MP</b> | 39.30         | 4.83          | 14.01         | 3.41          |

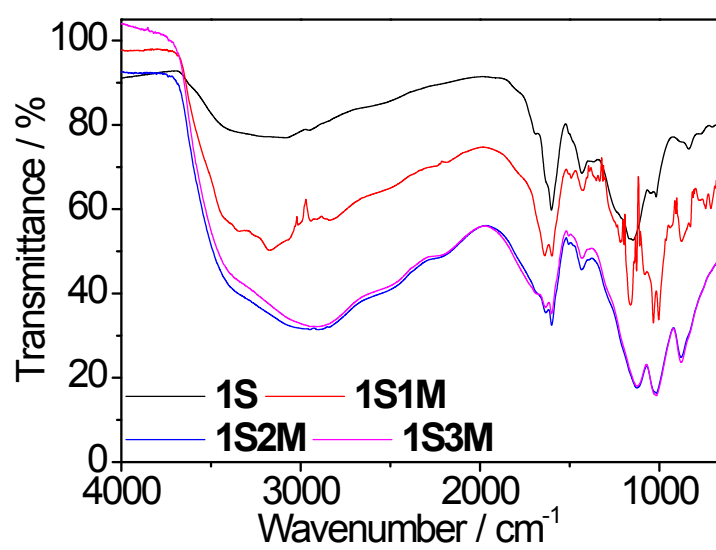

**Fig. S1.** IR spectra of 1S, 1S1M, 1S2M, and 1S3M.

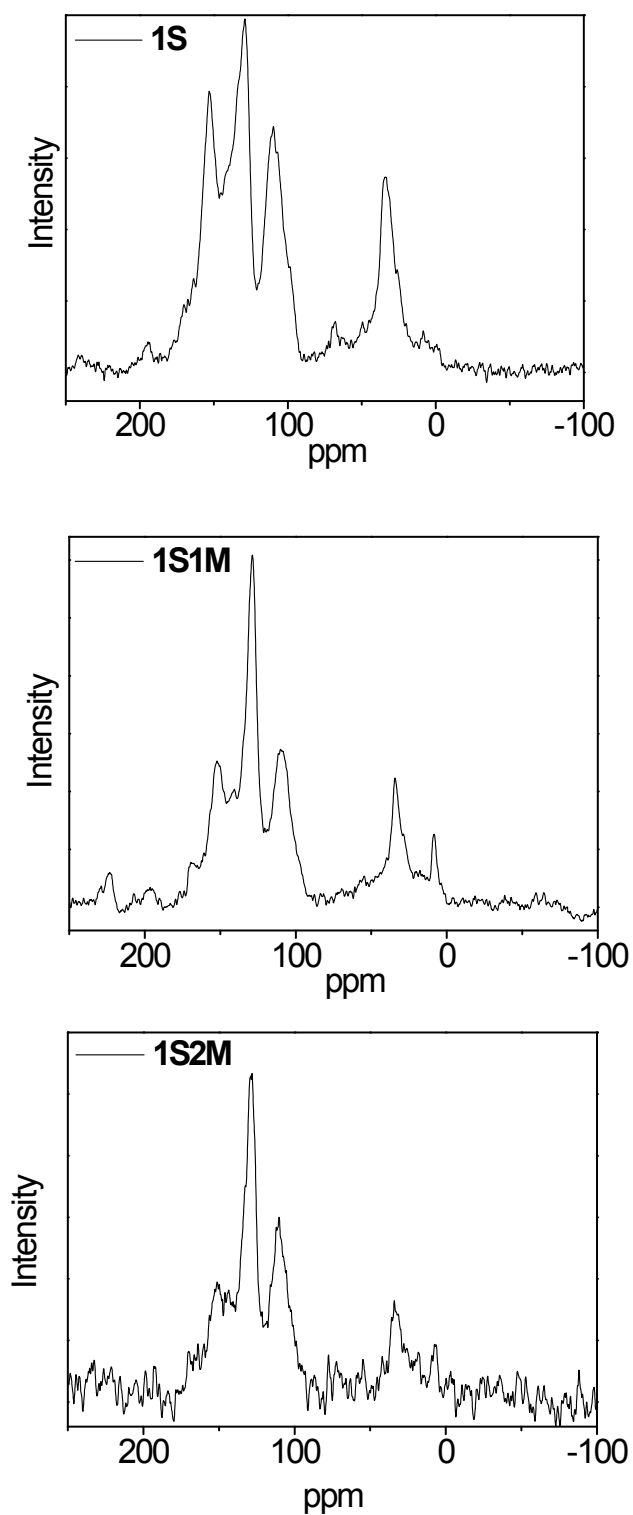

**Fig. S2.** Solid-state  $^{13}\text{C}$  NMR spectra for **1S**, **1S1M**, and **1S2M**. In case of **1S3M**, the NMR data could not be collected due to severe noise from  $\text{H}_2\text{SO}_4$  in **1S3M**.

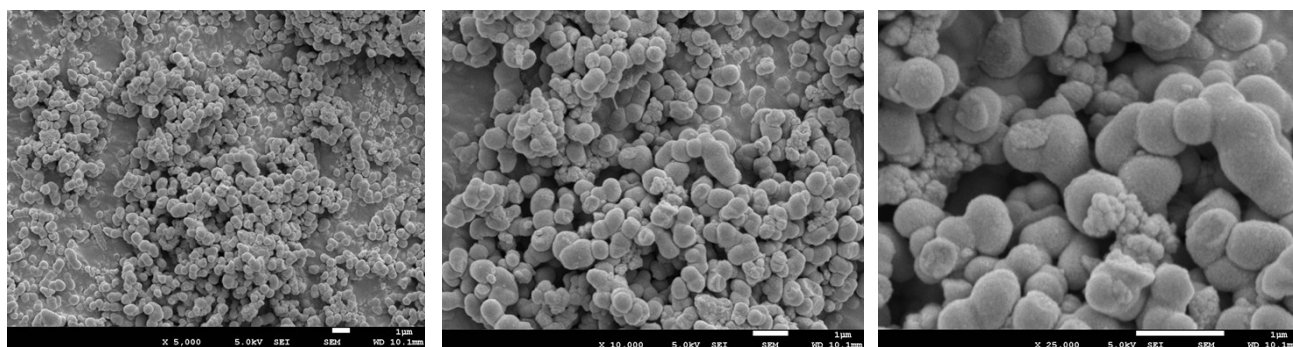

1S1M

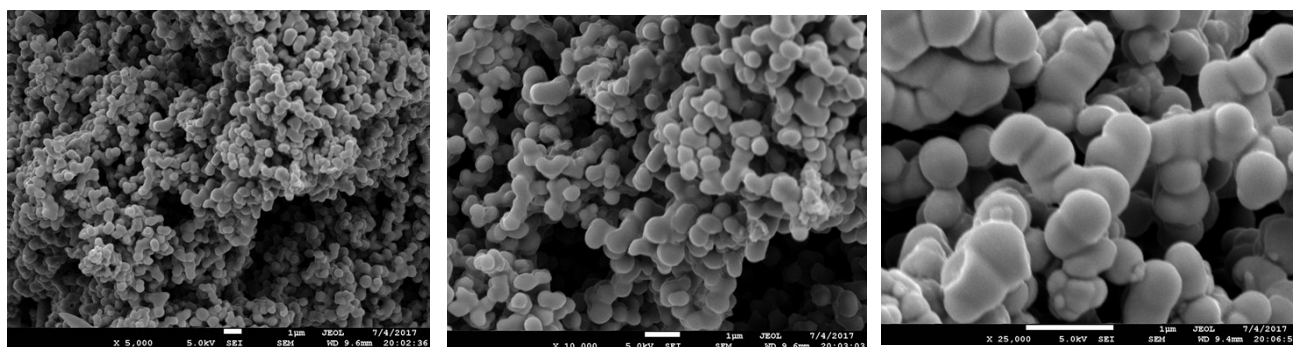

1S2M

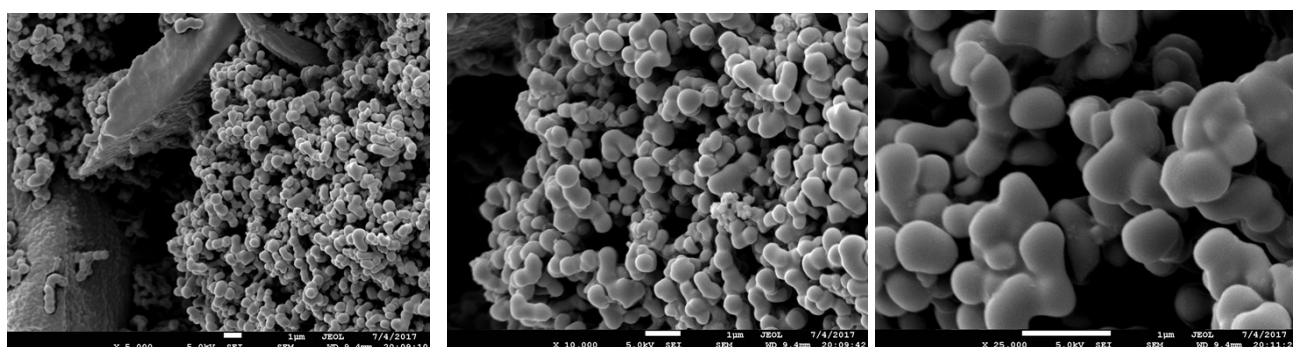

1S3M

**Fig. S3.** SEM images for the  $\text{H}_2\text{SO}_4$  impregnated samples. (x 5,000, x 10,000, and x 25,000)



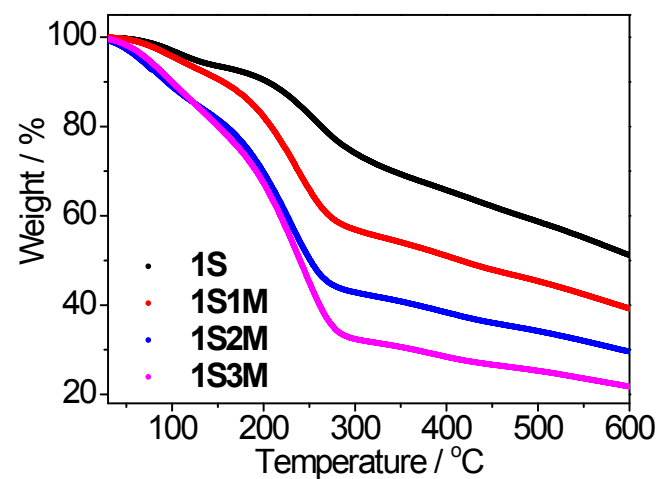

(a)

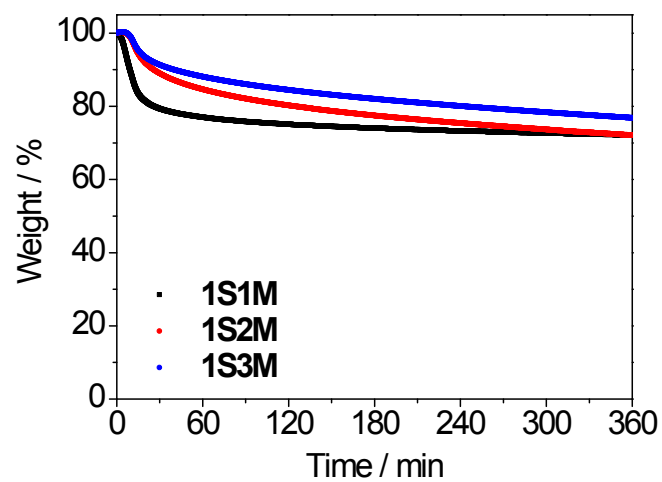

(b)

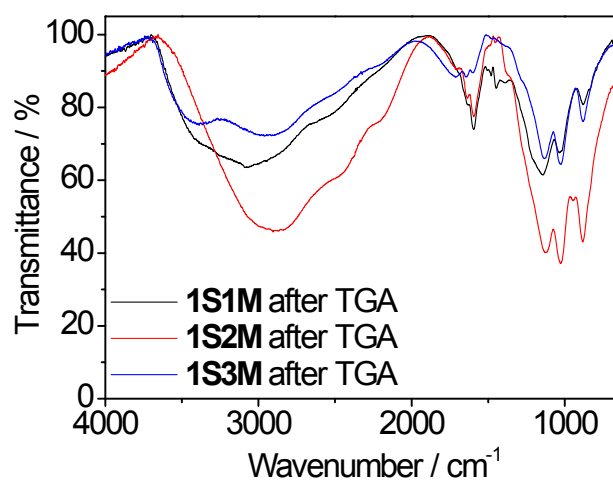

(c)

**Fig. S4.** TGA data for 1S, 1S1M, 1S2M, and 1S3M. Initial weight loss indicated the evaporation of water molecules.

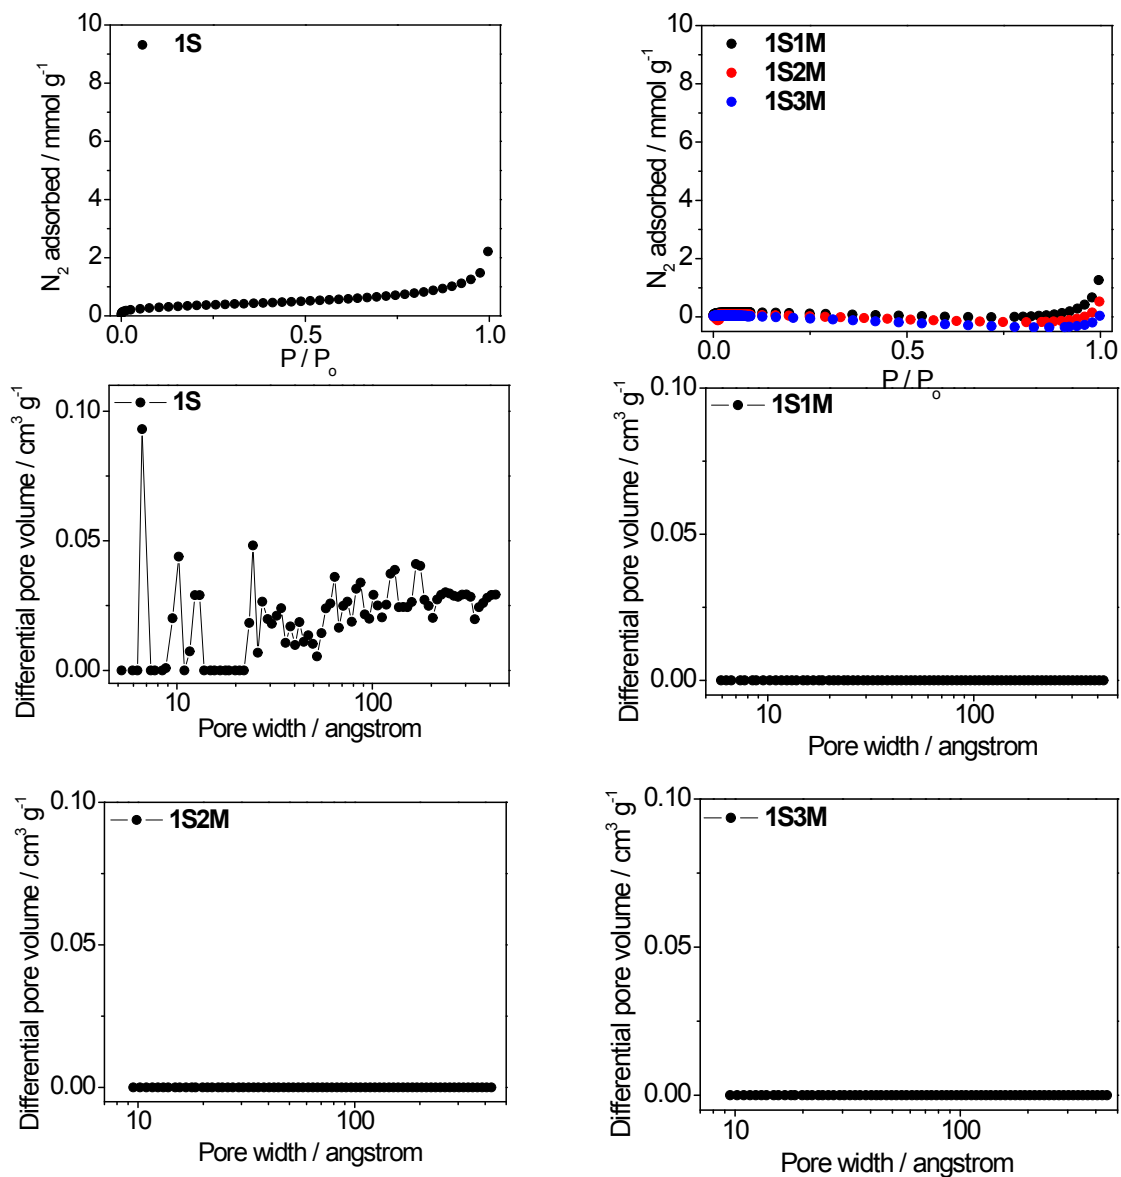

**Fig. S5.**  $N_2$  isotherms at 77 K and pore size distributions of **1S**, **1S1M**, **1S2M**, and **1S3M**. The distributions were calculated using Tarazona NLDFT method. The horizontal and vertical axes in the distribution curves represent pore width (Å) and differential pore volume (cm<sup>3</sup> g<sup>-1</sup>).

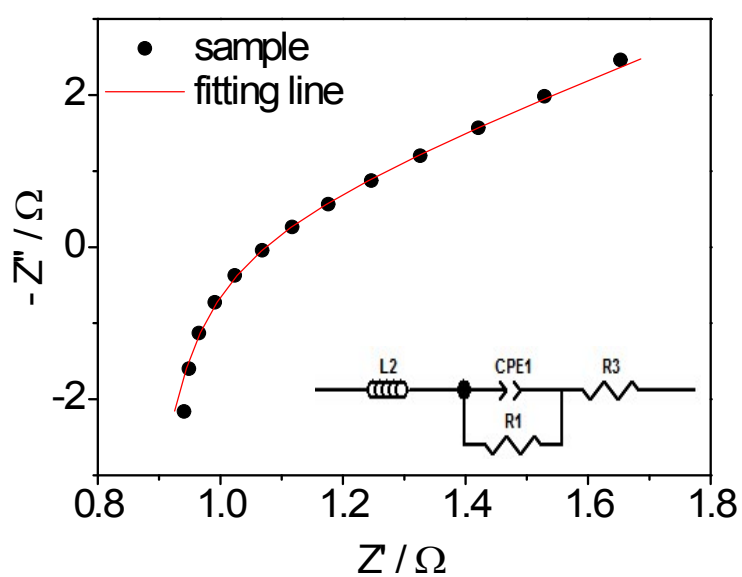

**Fig. S6.** To correct inductance error on high frequency area, a equivalent circuit was used in the impedance spectra fitting the samples.

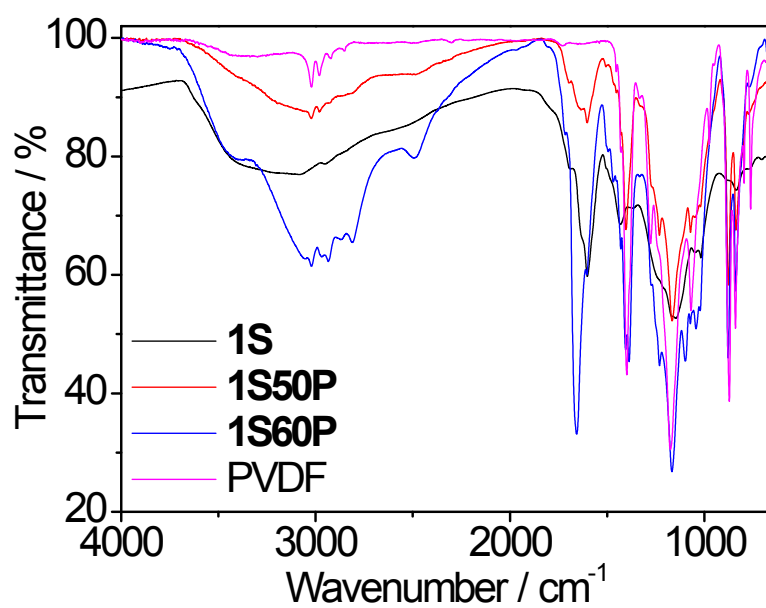

**Fig. S7.** IR spectra of **1S**, **1S50P**, **1S60P**, and **PVDF**.

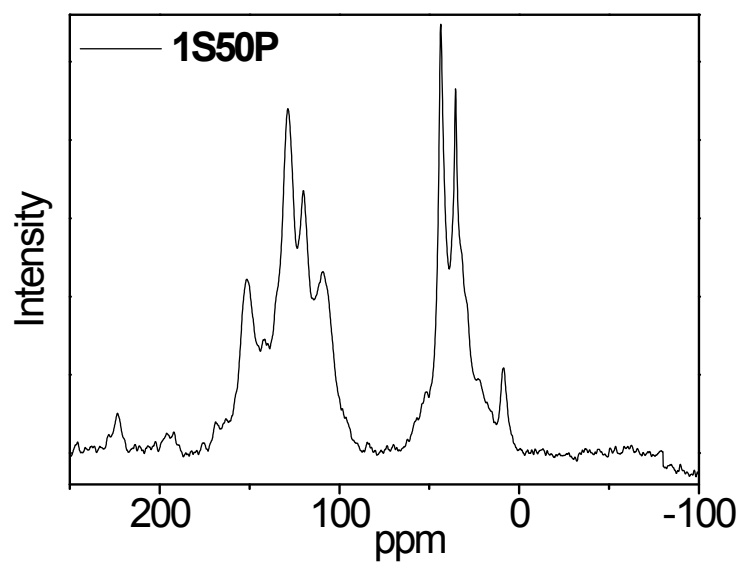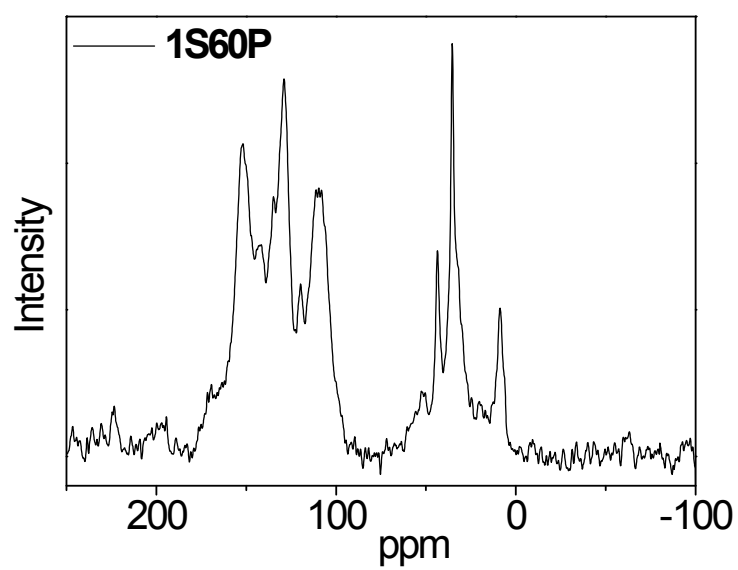

**Fig. S8.** Solid-state  $^{13}\text{C}$  NMR spectra for **1S50P** and **1S60P**. Peaks observed at  $\sim 44$  and  $\sim 120$  ppm are assignable to carbons of  $-\text{CH}_2-$  and  $-\text{CF}_2-$ , respectively.<sup>2</sup>

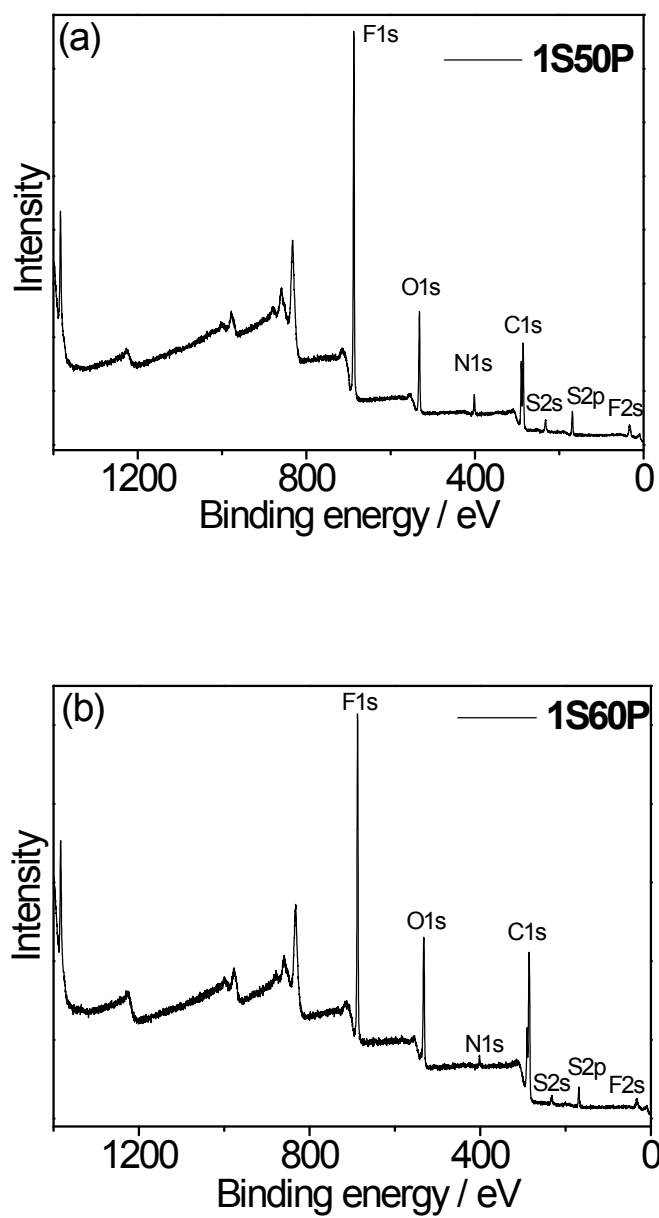

**Fig. S9.** Survey scan of XPS data for (a) **1S50P** and (b) **1S60P**.

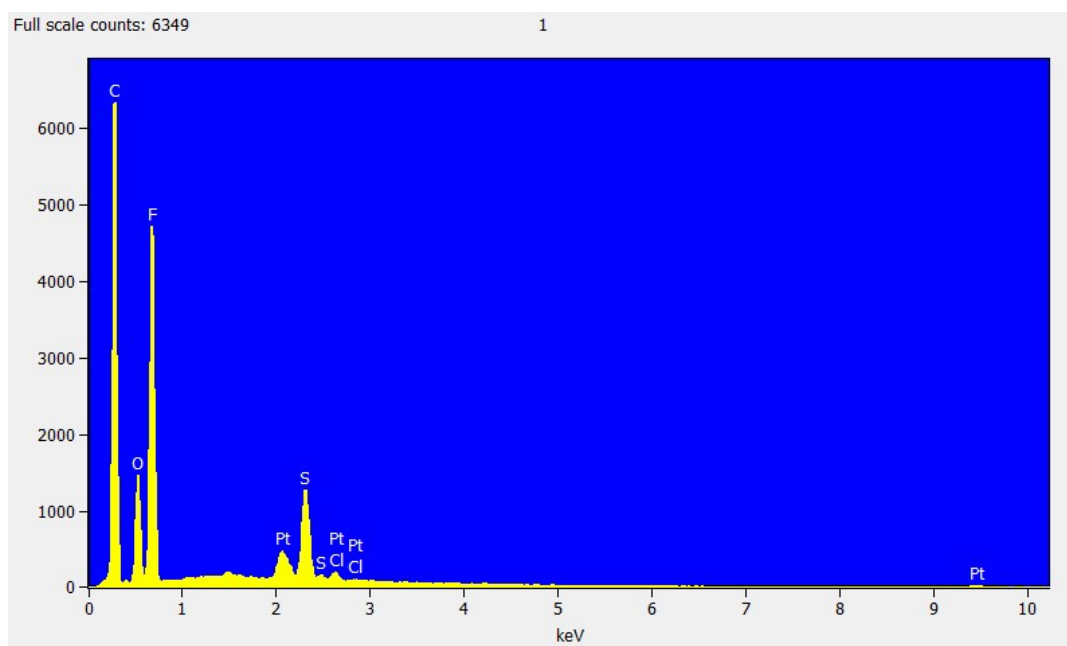

(a)

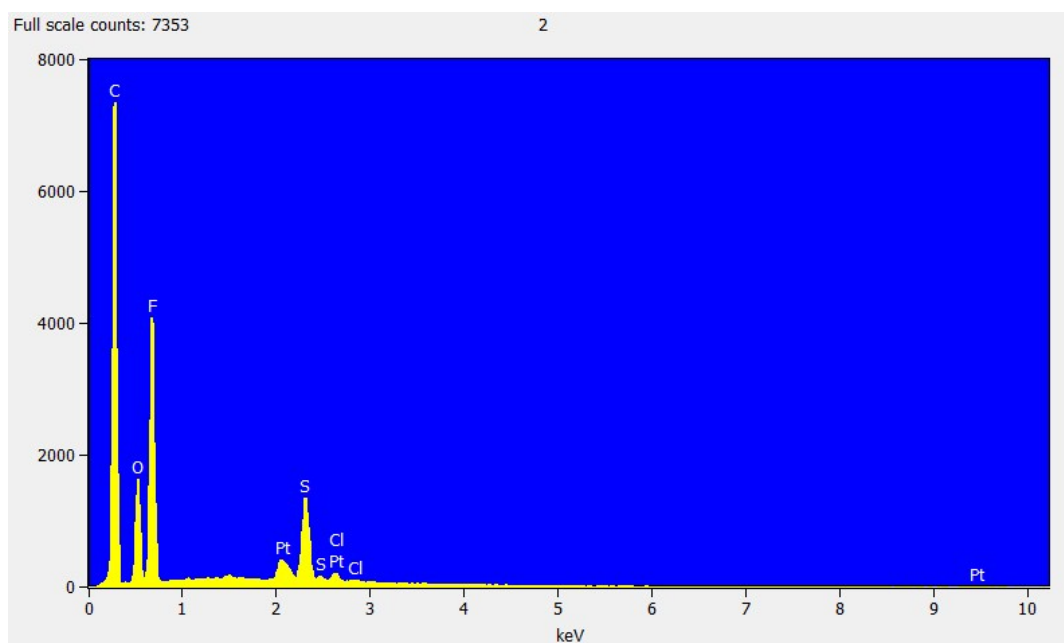

(b)

**Fig. S10.** EDX spectra of (a) **1S50P** and (b) **1S60P** membranes. The peak of Cl is due to the fact that sulfonation process via chlorosulfonic acid treatment produced both  $-\text{SO}_3\text{H}$  and  $-\text{SO}_2\text{Cl}$  species.<sup>3</sup> The peak of Pt is due to the fact that the samples were coated by Pt for EDX measurements to avoid a charge problem.

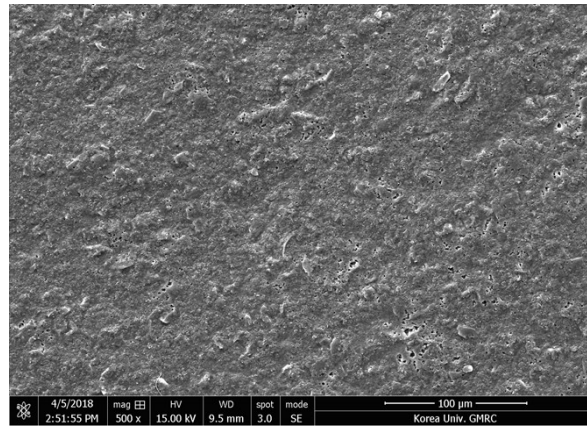

(a) x 500

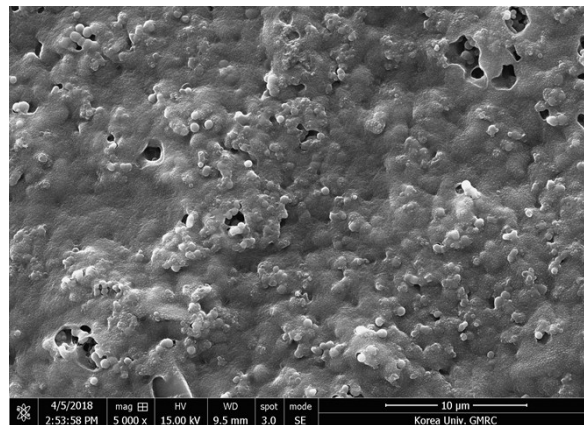

(b) x 5,000

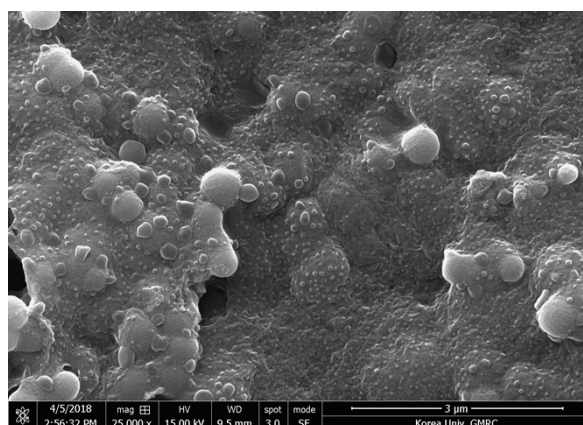

(c) x 25,000

**Fig. S11.** SEM images for **1S50P** with different magnifications.



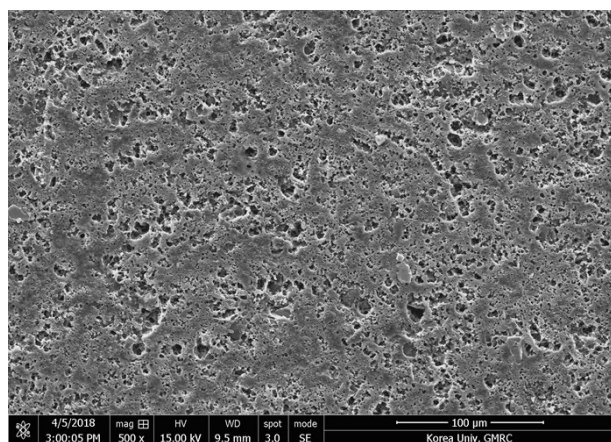

(a) x 500

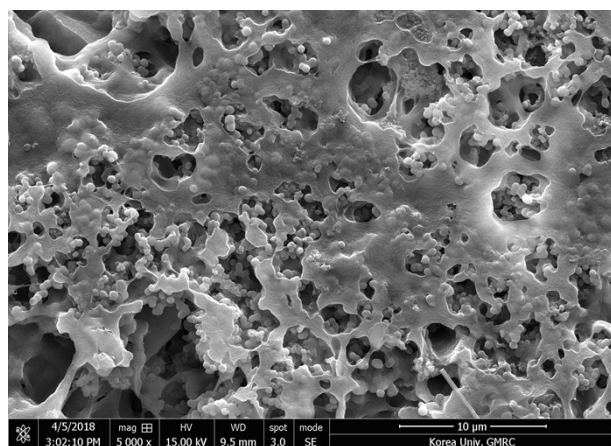

(b) x 5,000

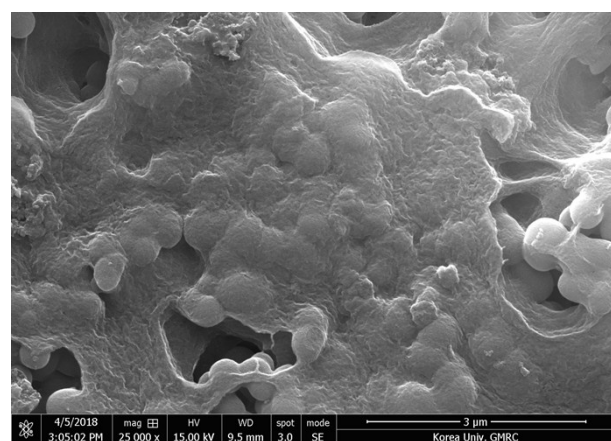

(c) x 25,000

**Fig. S12.** SEM images for **1S60P** with different magnifications.

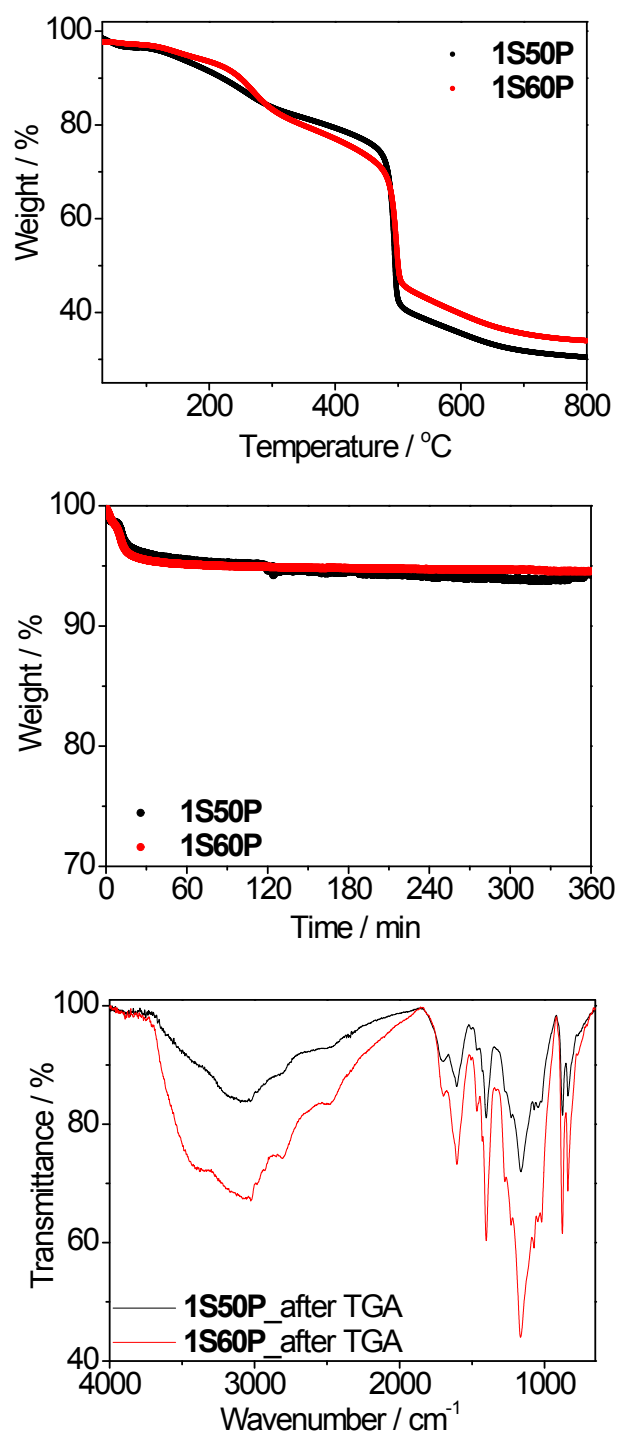

**Fig. S13.** TGA data for **1S50P** and **1S60P**. Initial weight loss indicated evaporation of solvent molecules like water and DMF.

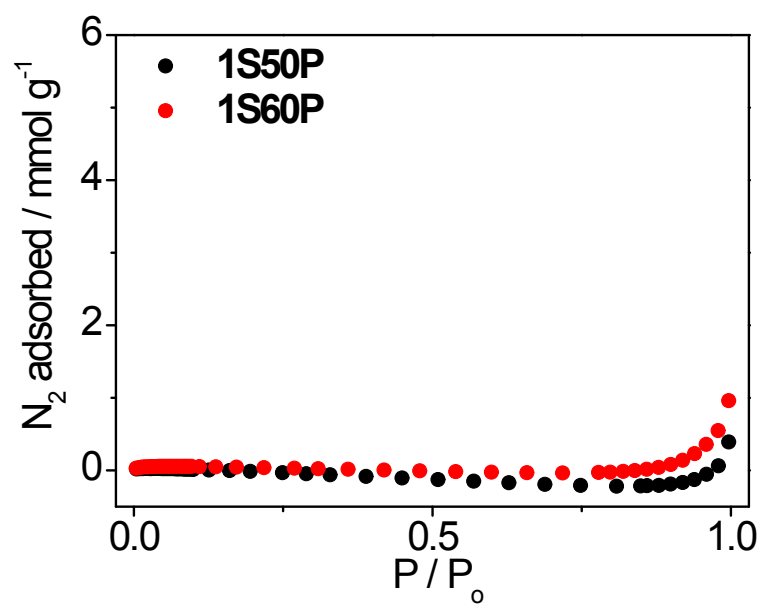

**Fig. S14.** N<sub>2</sub> isotherms of **1S50P** and **1S60P** at 77 K.

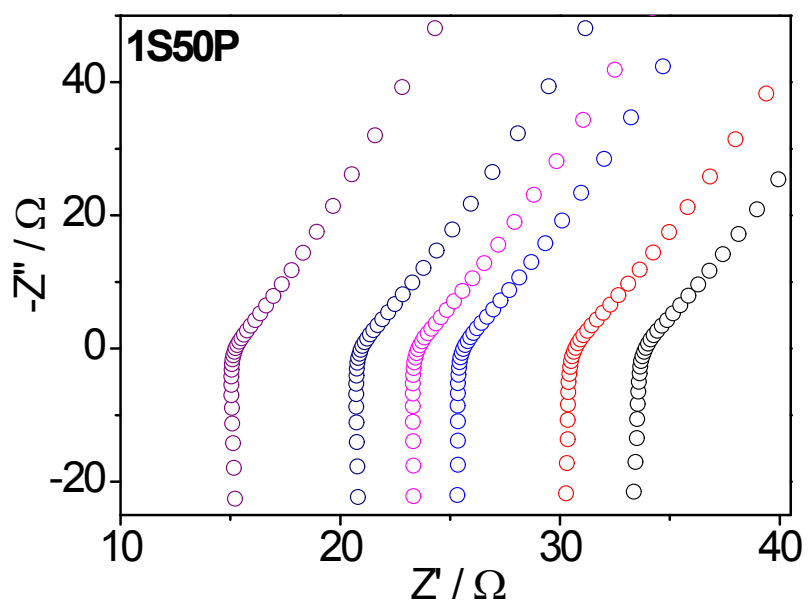

**Fig. S15.** Nyquist plots for **1S50P** at several temperatures and 90% RH condition. (30 °C – black, 40 °C – red, 50 °C – blue, 60 °C –magenta, 70 °C – navy, and 80 °C – purple)

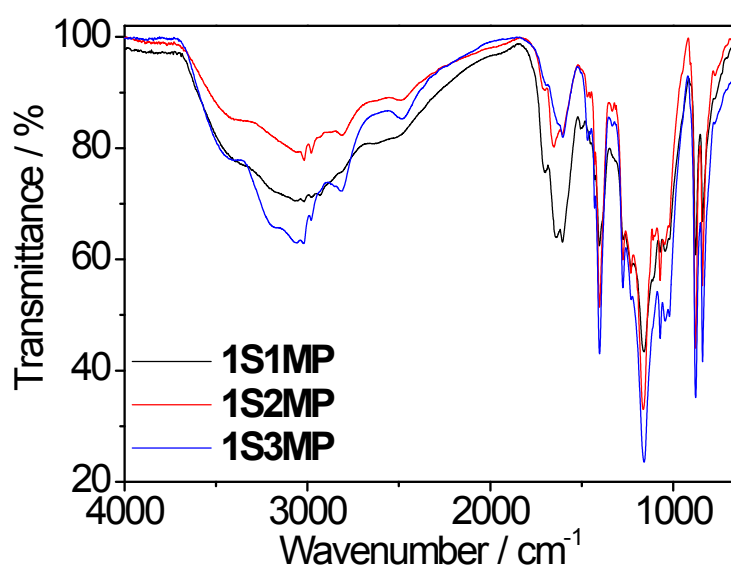

**Fig. S16.** IR spectra of 1S1MP, 1S2MP, and 1S3MP.

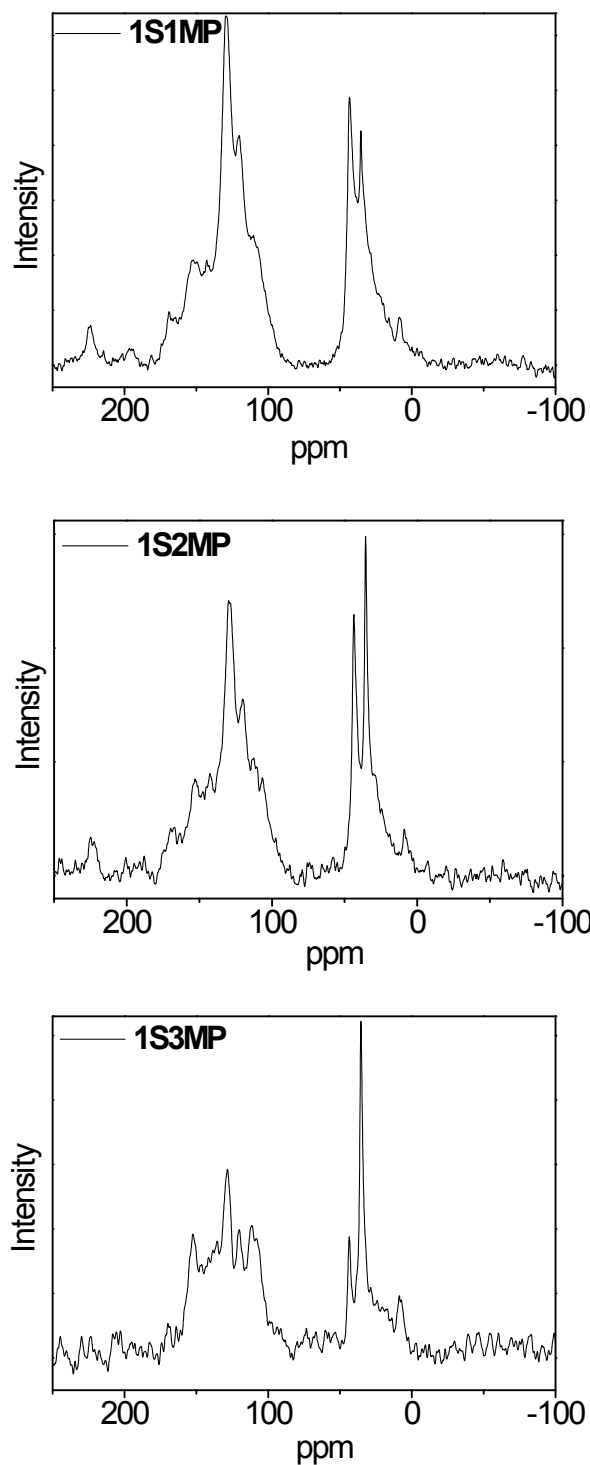

**Fig. S17.** Solid-state  $^{13}\text{C}$  NMR spectra for **1S1MP**, **1S2MP**, and **1S3MP**. Peaks related carbon of  $-\text{CH}_2-$  and  $-\text{CF}_2-$  were observed at  $\sim 44$  and  $\sim 120$  ppm, respectively.<sup>2</sup>

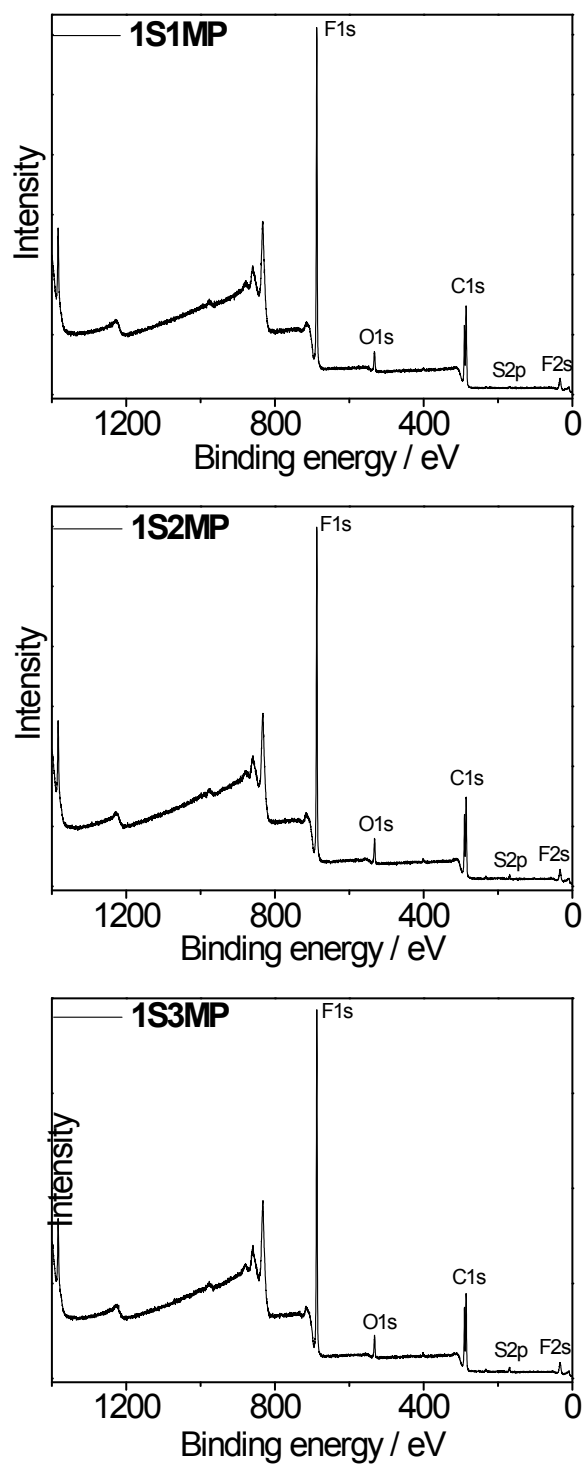

**Fig. S18.** XPS data of **1S1MP**, **1S2MP**, and **1S3MP**.

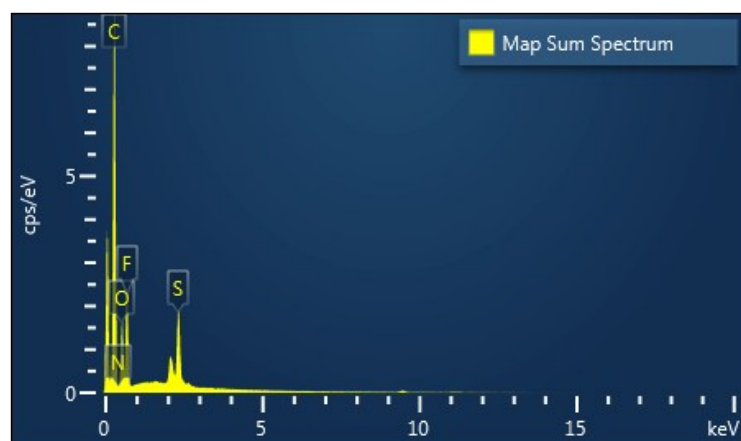

(a)

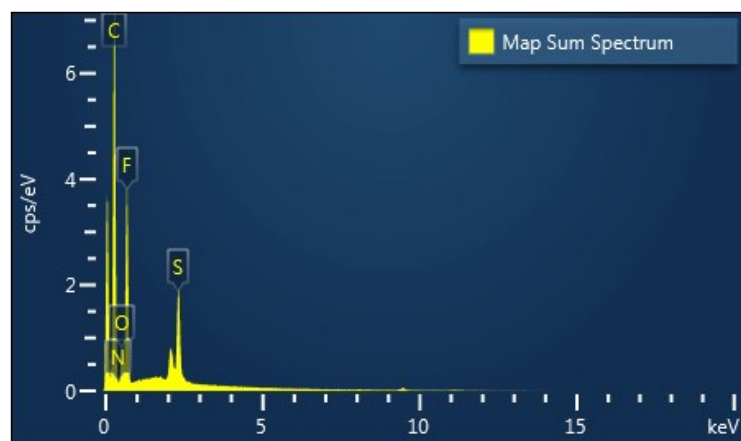

(b)

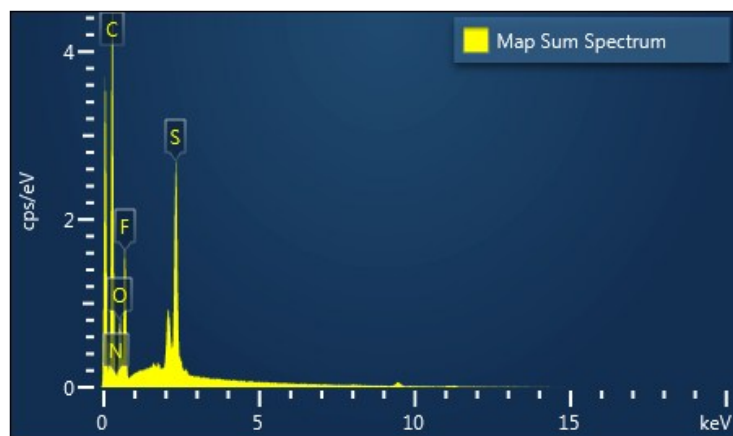

(c)

**Fig. S19.** EDX spectra of (a) 1S1MP, (b) 1S2MP, and (c) 1S3MP.



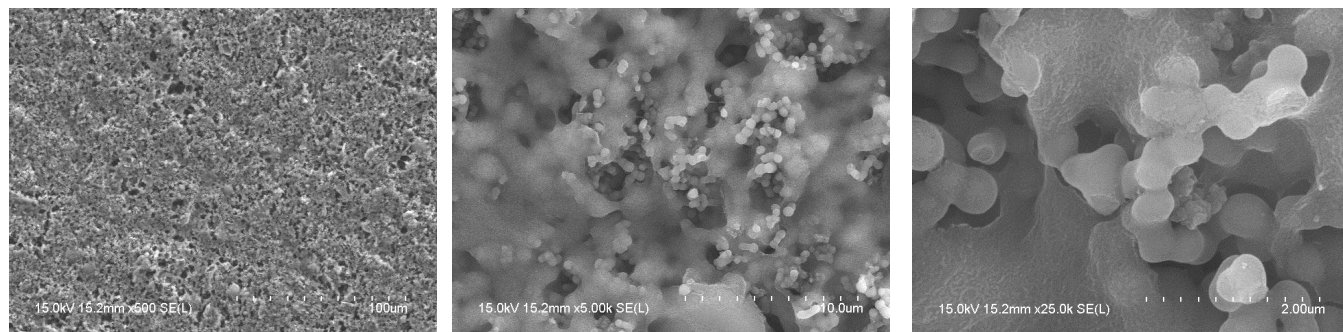

(a)

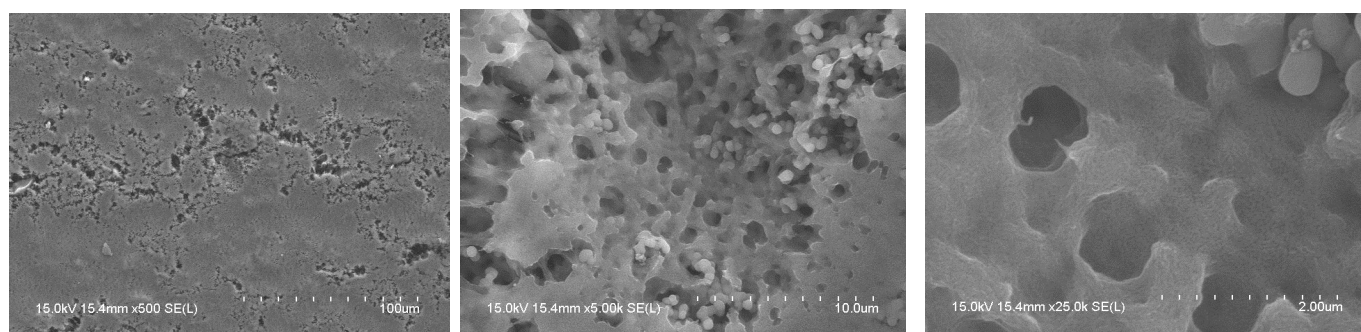

(b)

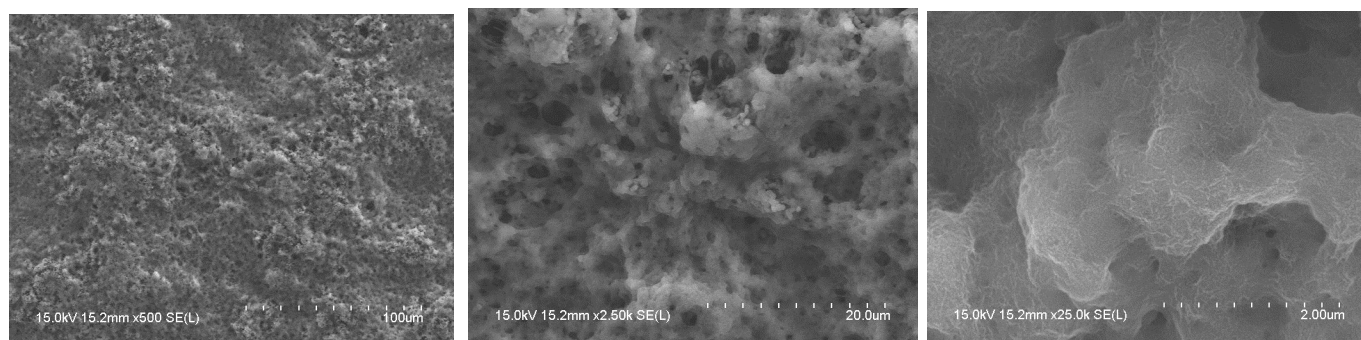

(c)

**Fig. S20.** SEM images for (a) **1S1MP**, (b) **1S2MP**, and (c) **1S3MP**. (x 500, x 5,000, and x 25,000)

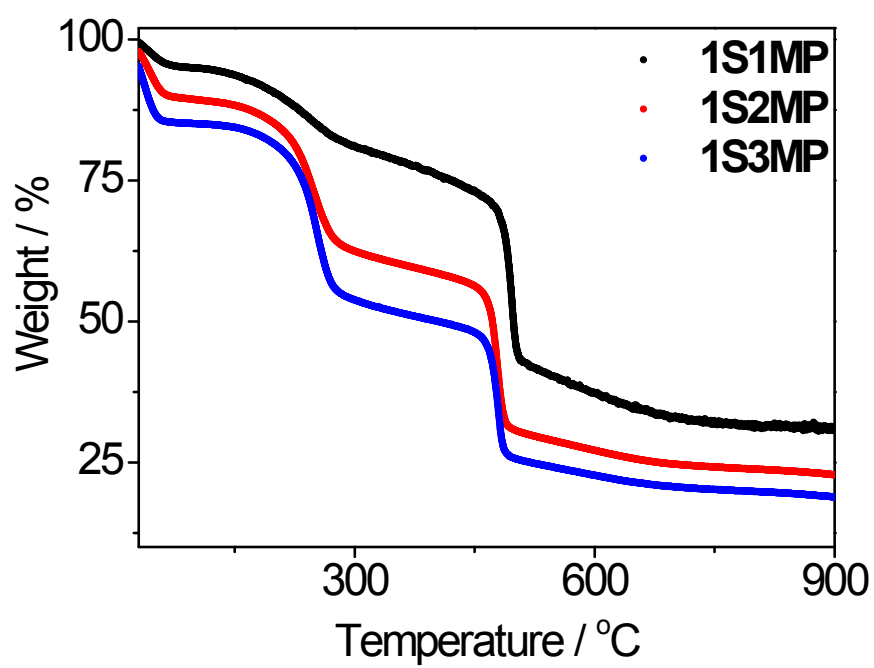

**Fig. S21.** TGA data for **1S1MP**, **1S2MP** and **1S3MP**.

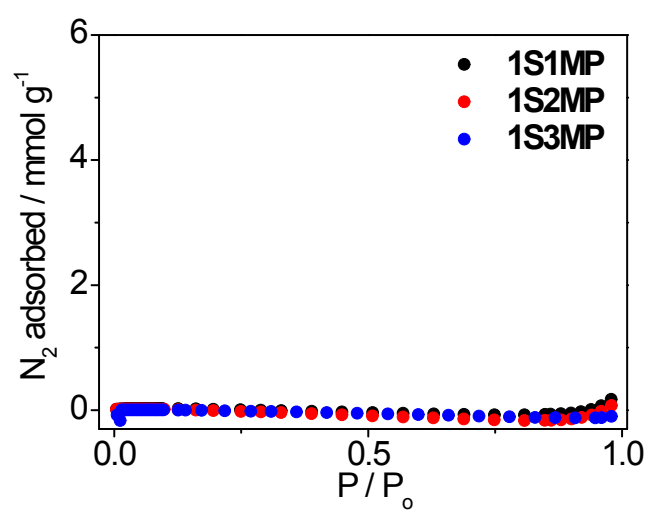

**Fig. S22.** N<sub>2</sub> isotherms of **1S1MP**, **1S2MP**, and **1S3MP** at 77 K.

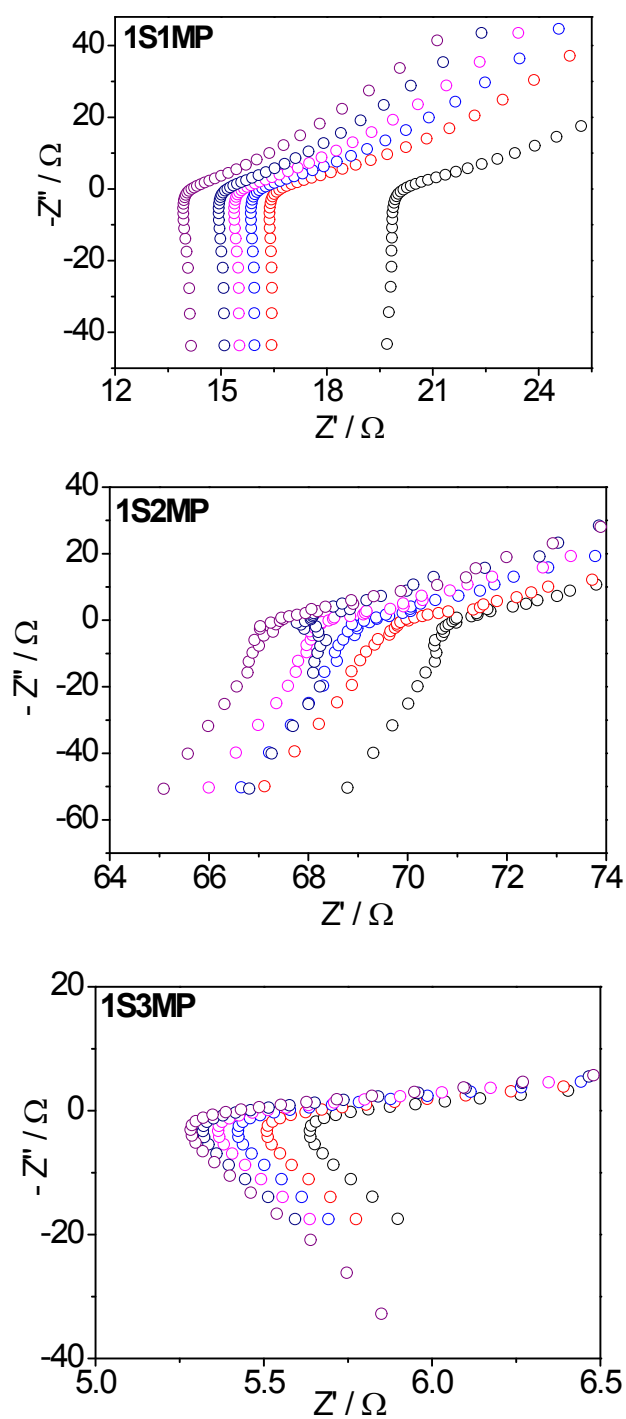

**Fig. S23.** Nyquist plots for **1S1MP**, **1S2MP**, and **1S3MP** at several temperatures and 90% RH condition. (30 °C – black, 40 °C – red, 50 °C – blue, 60 °C –magenta, 70 °C – navy, and 80 °C – purple)

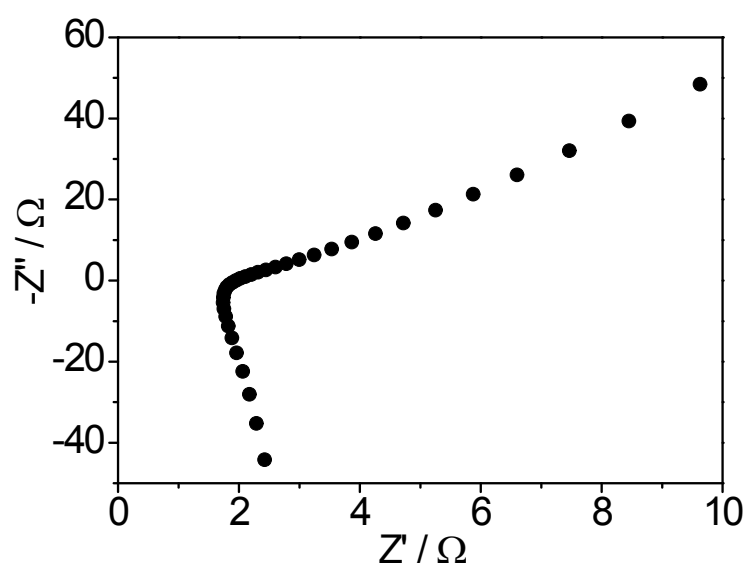

**Fig. S24.** A Nyquist plot for **1S3MP** at 20 °C and 90% RH condition.

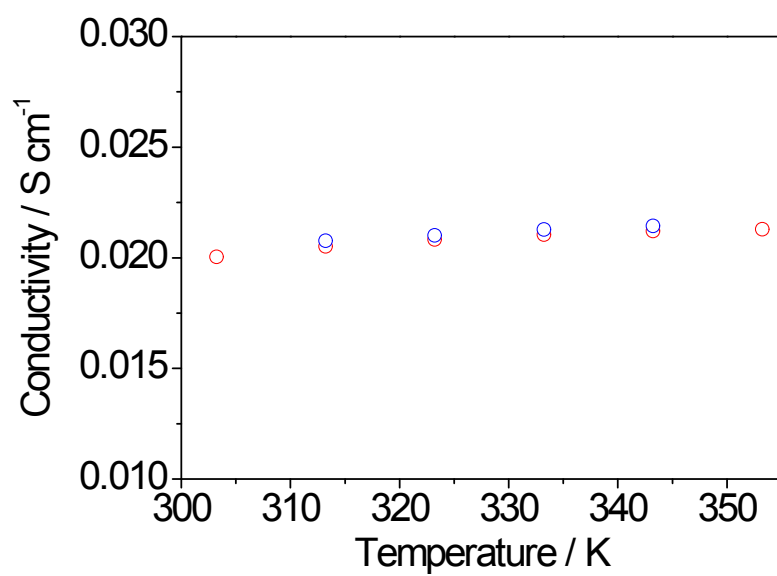

**Fig. S25.** Proton conductivities during heating-cooling cycle of **1S3MP** at 90% RH.

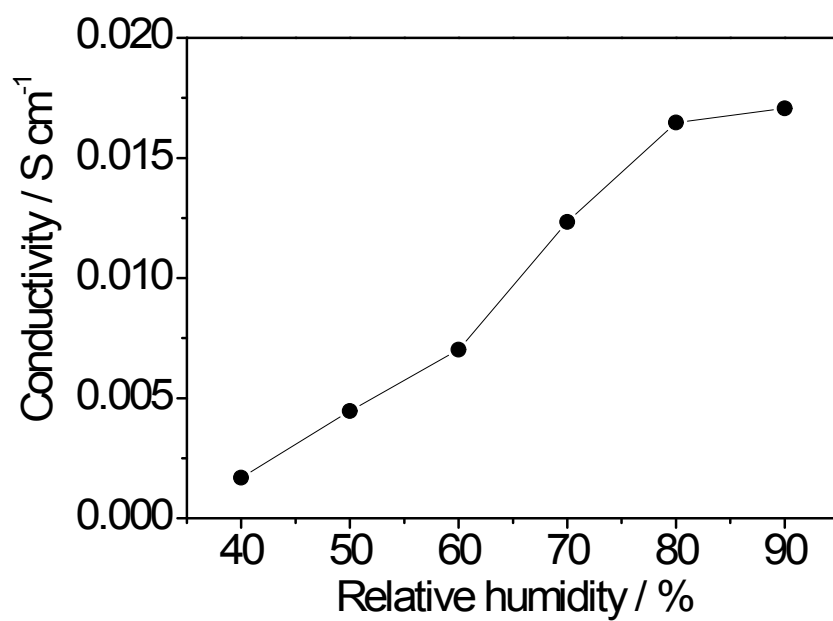

**Fig. S26.** RH dependence of proton conductivity for **1S3MP** at 25 °C.

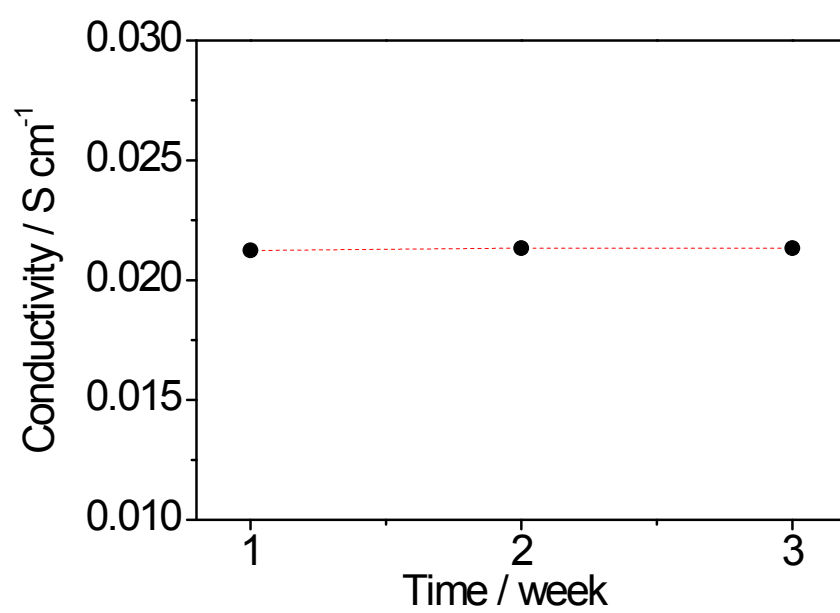

**Fig. S27.** Long-term performance of **1S3MP** at 80 °C and 90% RH.



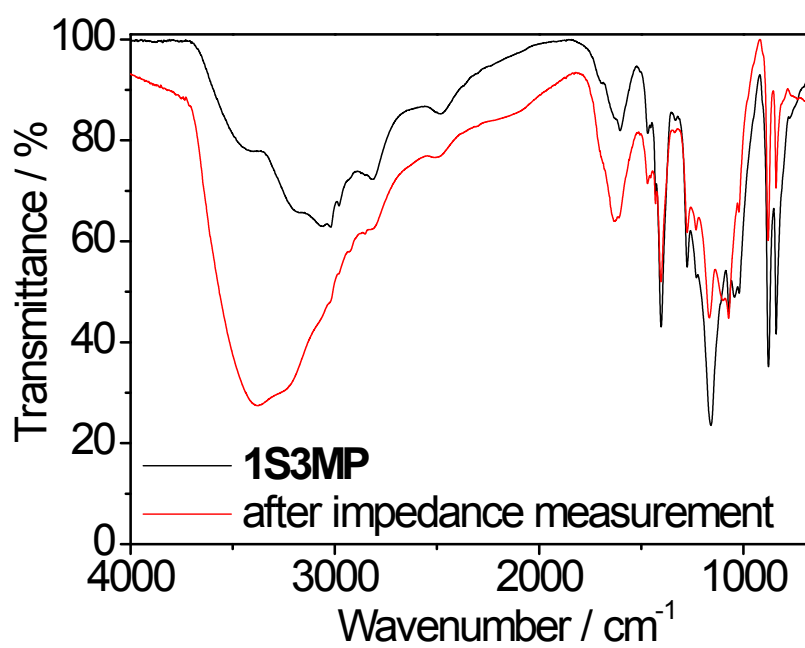

**Fig. S28.** FT-IR spectra of as-prepared **1S3MP** and **1S3MP** after long-term measurements.

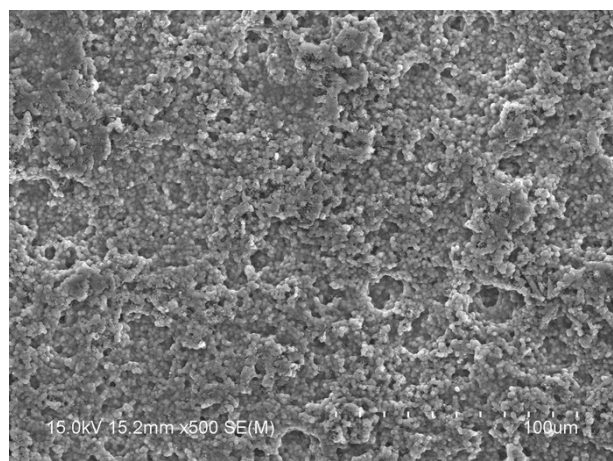

(a) x 500

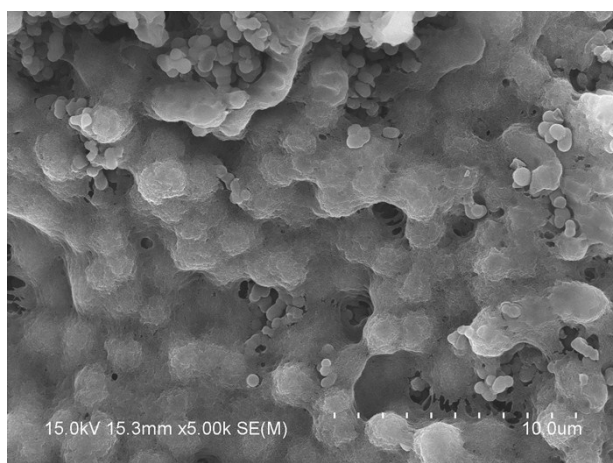

(b) x 5,000

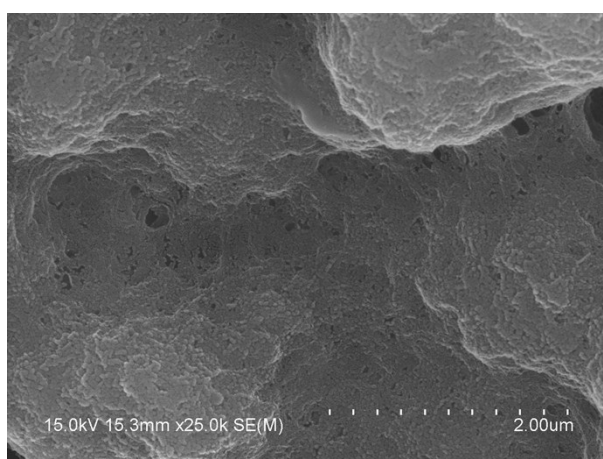

(c) x 25,000

**Fig. S29.** SEM images for **1S3MP** the membrane after conductivity measurements.

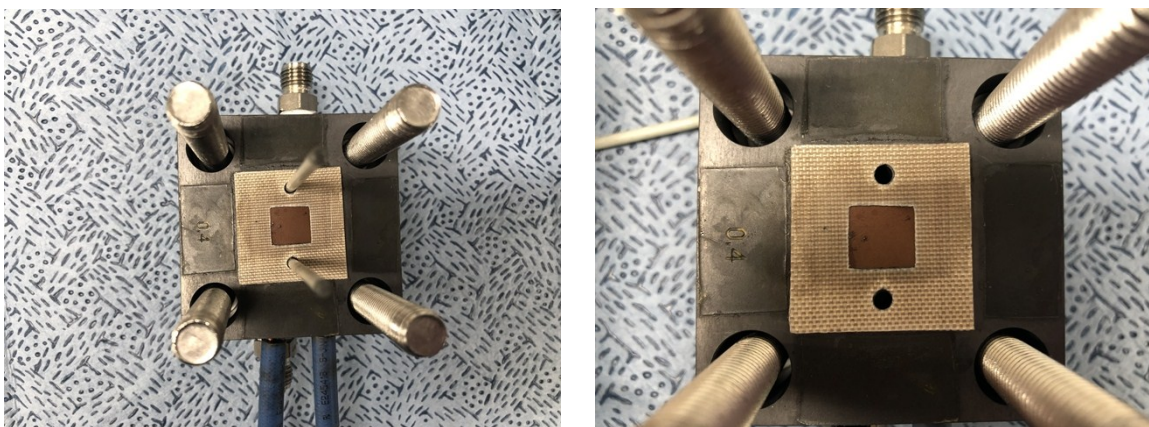

**Fig. S30.** Representation of membrane electrode assembly (MEA) cell. Test conditions were as follows. Cell temperature = 50 °C and 100 % RH, area = 1 cm<sup>2</sup> cathode/anode, catalyst loading (Pt/C 46.7 wt%) of anode = 0.2 mg cm<sup>-2</sup> and cathode = 0.4 mg cm<sup>-2</sup>, flow rate of H<sub>2</sub> = 200 cc min<sup>-1</sup>, flow rate of O<sub>2</sub> = 0.6 cc min<sup>-1</sup>.

**Table S2.** List of porous organic materials-based MEA performance in order of power density.

| <b>Compounds(form)</b>                   | <b>OCV (V)</b> | <b>Maximum<br/>current density<br/>(mA cm<sup>-2</sup>)</b> | <b>Maximum<br/>powder density<br/>(mW cm<sup>-2</sup>)</b> | <b>T (°C)</b> | <b>RH<br/>(%)</b> |
|------------------------------------------|----------------|-------------------------------------------------------------|------------------------------------------------------------|---------------|-------------------|
| <b>1S3MP (film)</b> <sup>this work</sup> | 0.921          | 173                                                         | 77                                                         | 50            | 100               |
| 1S (pellet) <sup>1</sup>                 | 0.95           | 148                                                         | 56                                                         | 80            | 100               |
| 1ES (pellet) <sup>4</sup>                | 0.72           | 150                                                         | 50                                                         | 80            | 100               |
| PTSA@TpAzo COFM (film) <sup>5</sup>      | 0.81           | 90                                                          | 24                                                         | 60            | 100               |
| PA@TpBpy-MC (pellet) <sup>6</sup>        | 0.86           | 29                                                          | 7                                                          | 50            | 0                 |
| MOF-801@PP-60 (film) <sup>7</sup>        | 0.95           | 4.53                                                        | 2.2                                                        | 30            | 100               |
| PA@TpBpy-ST (pellet) <sup>6</sup>        | 0.66           | -                                                           | -                                                          | 50            | 0                 |

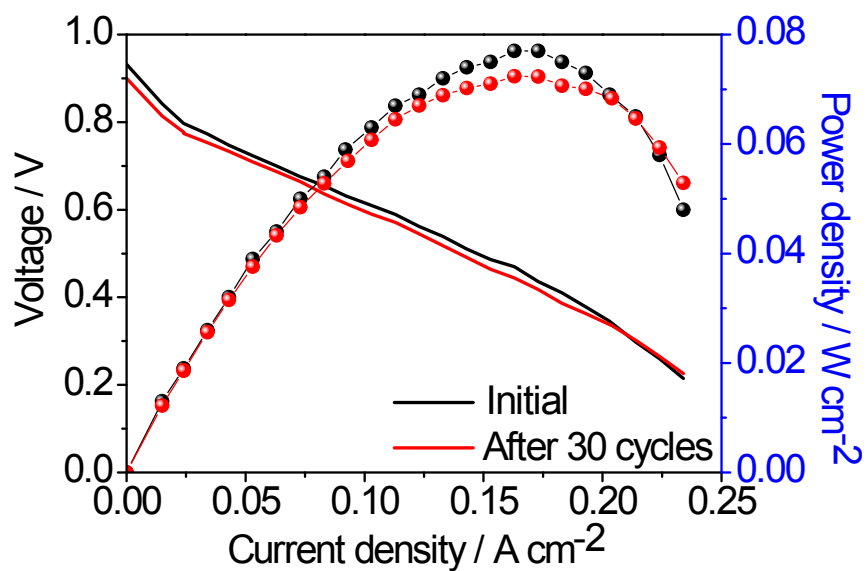

**Fig. S31.** Polarization curves of single cell with back pressure of 1.8 bar. The cell test was performed by cycling potential sweeping between 0.2–1.0  $V_{\text{RHE}}$  for 30 cycles. Test conditions were as follows. Cell temperature = 50 °C and RH = 100% , area = 1  $\text{cm}^2$  cathode/anode; catalyst loading (Pt/C 46.7 wt%) of anode = 0.2  $\text{mg cm}^{-2}$  and cathode = 0.4  $\text{mg cm}^{-2}$ ; flow rate of  $\text{H}_2$  = 200  $\text{cc min}^{-1}$ ;  $\text{O}_2$  = 600  $\text{cc min}^{-1}$ .

**Before OCV hold test**

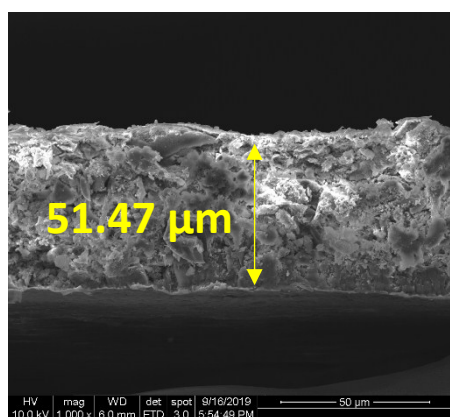

**After OCV hold test**

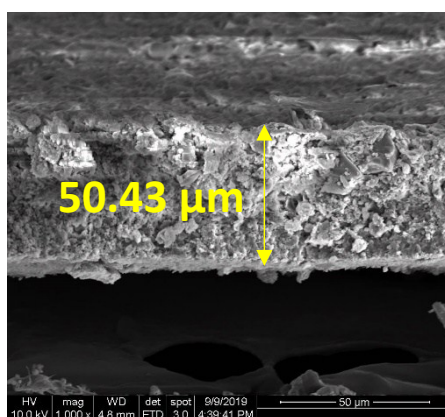

**Fig. S32.** SEM images of 1S3MP membrane before and after OCV hold test.

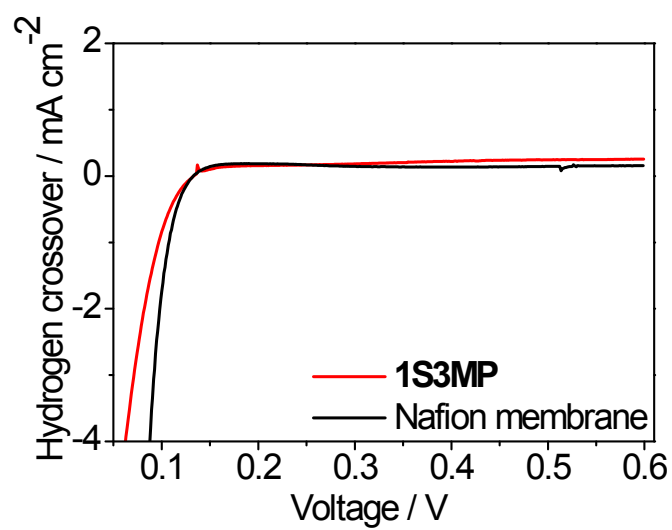

**Fig. S33.** H<sub>2</sub> crossover current densities of MEAs with **1S3MP** and Nafion membrane. Test conditions were as follows. Cell temperature = 27 °C and 100% , flow rate of H<sub>2</sub> = 200 cc min<sup>-1</sup>; N<sub>2</sub> = 600 cc min<sup>-1</sup>.

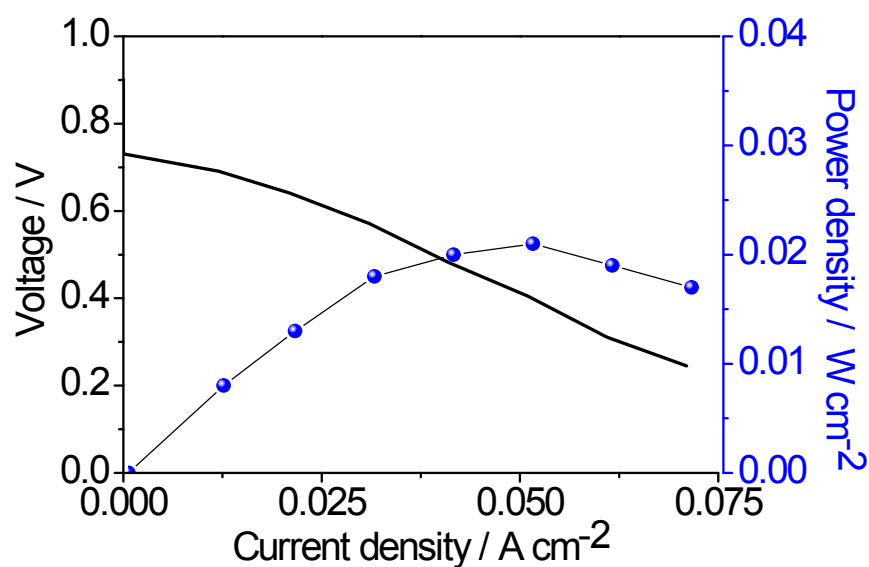

**Fig. S34.** Polarization curve of single cell with back pressure of 1.8 bar. The cell temperature was maintained at 27 °C. Test conditions were as follows. Cell temperature = 27 °C and RH 100% , area : 1  $\text{cm}^2$  cathode/anode; catalyst loading (Pt/C 46.7 wt%) of anode = 0.2  $\text{mg cm}^{-2}$  and cathode = 0.4  $\text{mg cm}^{-2}$ ; flow rate of  $\text{H}_2$  = 200  $\text{cc min}^{-1}$ ;  $\text{O}_2$  = 600  $\text{cc min}^{-1}$ .

## Reference



1. D. W. Kang, K. S. Lim, K. J. Lee, J. H. Lee, W. R. Lee, J. H. Song, K. H. Yeom, J. Y. Kim and C. S. Hong, *Angew. Chem. Int. Ed.*, 2016, **55**, 16123-16126.
2. T. Montina, P. Wormald and P. Hazendonk, *Macromolecules*, 2012, **45**, 6002-6007.
3. A. Del Prado, N. Briz, R. Navarro, M. Pérez, A. Gallardo and H. Reinecke, *Macromolecules*, 2012, **45**, 2648-2653.
4. D. W. Kang, J. H. Song, K. J. Lee, H. G. Lee, J. E. Kim, H. Y. Lee, J. Y. Kim and C. S. Hong, *J. Mater. Chem. A*, 2017, **5**, 17492-17498.
5. H. S. Sasmal, H. B. Aiyappa, S. N. Bhange, S. Karak, A. Halder, S. Kurungot and R. Banerjee, *Angew. Chem. Int. Ed.*, 2018, **57**, 10894-10898.
6. D. B. Shinde, H. B. Aiyappa, M. Bhadra, B. P. Biswal, P. Wadge, S. Kandambeth, B. Garai, T. Kundu, S. Kurungot and R. Banerjee, *J. Mater. Chem. A*, 2016, **4**, 2682-2690.
7. J. Zhang, H. J. Bai, Q. Ren, H. B. Luo, X. M. Ren, Z. F. Tian and S. Lu, *ACS Appl. Mater. Interfaces*, 2018, **10**, 28656-28663.
